# Supplementary material for: Enhanced toluene adsorption/desorption dynamic performances over modified USY zeolites after an aqueous ammonia treatment
Source: Royal Society of Chemistry journal article supplement (doi:10.1039/d1ra04034k), 2021-01-01
Supplement: d1ra04034k1.pdf [file d1ra04034k1.pdf]

1 **Appendix A. Supplementary data**

2

3 **Enhanced toluene adsorption/desorption dynamic performances over USY**  
4 **zeolites by aqueous ammonia treatment**

5

6 Shan Gao,<sup>ab</sup> Yuanru Liao,<sup>a</sup> Yaoyu Zhang,<sup>a</sup> Yue Liu<sup>ab</sup> and Zhongbiao Wu<sup>\*ab</sup>

7

8 a. Department of Environmental Engineering, Zhejiang University, 866  
9 Yuhangtang Road, Hangzhou, 310058, China. E-mail: yaoyuzhang@zju.edu.cn

10 b. Zhejiang Provincial Engineering Research Center of Industrial Boiler &  
11 Furnace Flue Gas Pollution Control, 866 Yuhangtang Road, Hangzhou, 310058,  
12 China.

13

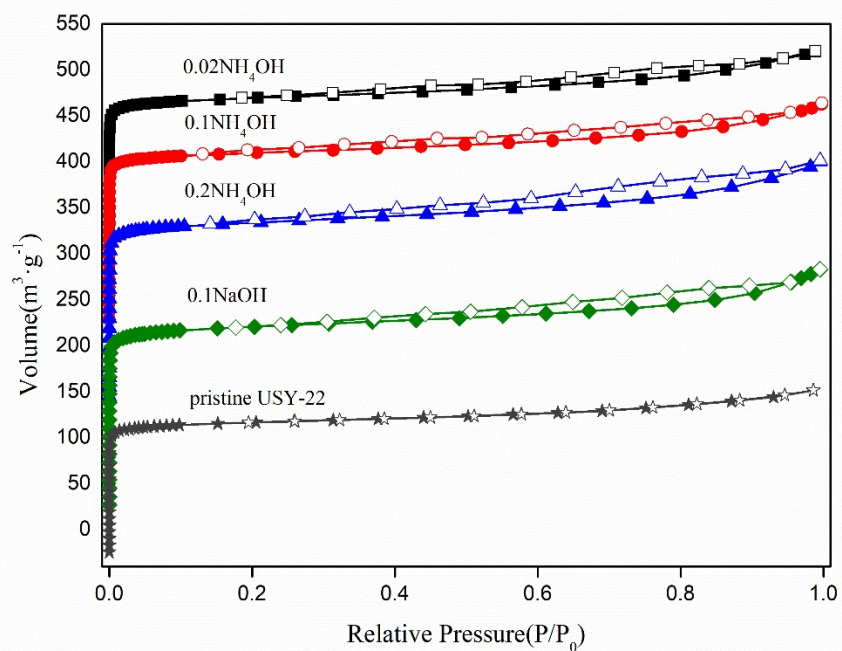

14

15 **Fig. S1** Nitrogen adsorption-desorption isotherms of all studied samples.

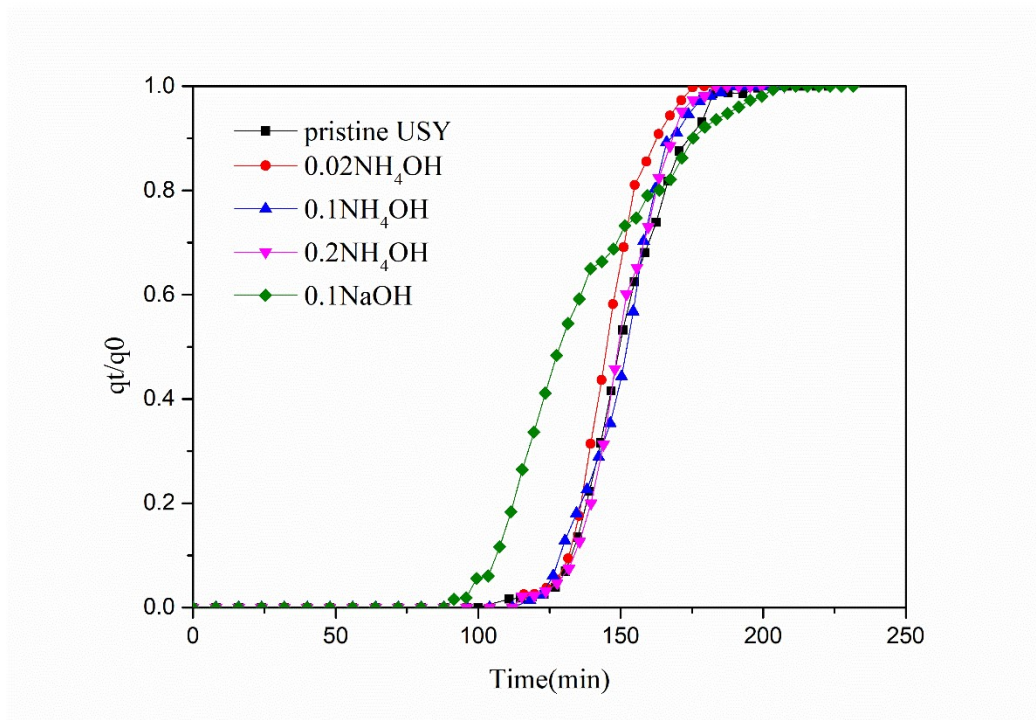

16

17 **Fig. S2** Breakthrough curves of all studied samples under humid condition (RH=30%).

18

19
